# Supplementary material
Source: PubMed Central journal article supplement (PMC5507642)
Supplement: supp_the2017-0031_onco12121-sup-0001-suppinfo01.pdf [file supp_the2017-0031_onco12121-sup-0001-suppinfo01.pdf]

Supplemental Table for:  
BRAF mutations as predictive biomarker for response to anti-EGFR monoclonal antibodies  
Jan Schellens et al.

**Table S1.** Overview of clinical trials included in meta-analyses on *BRAF* mutations.

|                                 | Study design  | Treatment line                       | Pietrantonio | Rowland | Therkildsen | Yuan | Xu | Wang | Cui |
|---------------------------------|---------------|--------------------------------------|--------------|---------|-------------|------|----|------|-----|
| Bokemeyer 2011 (OPUS)           | RCT           | 1 <sup>st</sup>                      |              |         |             |      |    |      | x   |
| Bokemeyer 2012 (OPUS + CRYSTAL) | RCT           | 1 <sup>st</sup>                      | x            | x       | x           | x    |    | x    |     |
| Benvenuti 2007                  | Retrospective | 1 <sup>st</sup> and ≥2 <sup>nd</sup> |              |         |             | x    | x  |      |     |
| Cappuzzo 2008                   | Retrospective | ≥2 <sup>nd</sup>                     |              |         |             | x    | x  |      |     |
| De Roock 2010                   | Retrospective | ≥2 <sup>nd</sup>                     |              |         | x           | x    | x  | x    |     |
| Di Nicolantonio 2008            | Retrospective | ≥2 <sup>nd</sup>                     |              |         |             | x    | x  |      |     |
| Douillard 2013 (PRIME)          | RCT           | 1 <sup>st</sup>                      | x            | x       | x           |      |    |      |     |
| Fornaro 2011                    | Retrospective | ≥2 <sup>nd</sup>                     |              |         |             | x    | x  |      |     |
| Freeman 2008                    | Retrospective | 1 <sup>st</sup> and ≥2 <sup>nd</sup> |              |         |             | x    | x  |      |     |
| Gao 2011                        | RCT           | n.r.                                 |              |         | x           |      |    |      |     |
| Garcia 2011                     | RCT           | ≥2 <sup>nd</sup>                     |              |         | x           |      | x  |      |     |
| Inno 2011                       | RCT           | n.r.                                 |              |         | x           |      |    |      |     |
| Karapetis 2014                  | RCT           | Refractory                           | x            | x       |             |      |    |      |     |
| Laurent-Puig 2009               | Retrospective | ≥2 <sup>nd</sup>                     |              |         |             | x    | x  |      |     |
| Loupakis 2009                   | RCT           | Irinotecan-refractory                |              |         | x           | x    | x  | x    |     |
| Modest 2012 (AIO-KRK0104)       | RCT           | 1 <sup>st</sup>                      |              |         | x           | x    | x  | x    | x   |
| Molinari 2009                   | RCT           | Refractory                           |              |         | x           | x    | x  |      |     |
| Montagut 2010                   | Retrospective | 1 <sup>st</sup> and ≥2 <sup>nd</sup> |              |         |             |      | x  |      |     |
| Moroni 2005                     | Retrospective | 1 <sup>st</sup> and ≥2 <sup>nd</sup> |              |         |             | x    | x  |      |     |
| Park 2011                       | RCT           | ≥2 <sup>nd</sup>                     |              |         | x           | x    |    | x    |     |
| Peeters 2013                    | RCT           | Refractory                           | x            | x       | x           |      |    |      |     |
| Peeters 2014                    | RCT           | 2 <sup>nd</sup>                      | x            | x       |             |      |    |      |     |

Supplemental Table for:  
BRAF mutations as predictive biomarker for response to anti-EGFR monoclonal antibodies  
Jan Schellens et al.

|                           |               |                                      |   |   |   |   |   |   |
|---------------------------|---------------|--------------------------------------|---|---|---|---|---|---|
| Perrone 2009              | RCT           | Irinotecan-refractory                |   |   | x | x | x |   |
| Saridaki 2011             | RCT           | ≥2 <sup>nd</sup>                     |   |   | x | x | x | x |
| Sartore Bianchi 2009      | Retrospective | 1 <sup>st</sup> and ≥2 <sup>nd</sup> |   |   |   | x | x |   |
| Seymour 2013 (PICCOLO)    | RCT           | ≥2 <sup>nd</sup>                     | x | x |   |   |   |   |
| Smith 2013                | RCT           | 1 <sup>st</sup>                      | x | x |   |   |   |   |
| Soeda 2013                | RCT           | ≥3 <sup>rd</sup>                     |   |   | x |   |   |   |
| Spindler 2011             | Prospective   | 3 <sup>rd</sup>                      |   |   |   | x |   |   |
| Stintzing 2014 (FIRE-3)   | RCT           | 1 <sup>st</sup>                      | x |   |   |   |   |   |
| Tol 2010                  | RCT           | 1 <sup>st</sup>                      |   |   | x | x | x |   |
| Tural 2013                | RCT           | Refractory                           |   |   | x |   |   |   |
| Tveit 2011 (Nordic VII)   | RCT           | 1 <sup>st</sup>                      | x |   |   | x | x | x |
| Ulivi 2012                | Prospective   | ≥2 <sup>nd</sup>                     |   |   | x |   |   | x |
| Van Cutsem 2011 (CRYSTAL) | RCT           | 1 <sup>st</sup>                      |   |   |   | x | x | x |
| Wong 2011                 | Prospective   | 1 <sup>st</sup>                      |   |   |   | x |   |   |

RCT = randomized clinical trial; n.r. = not reported
